# Supplementary material for: Dietary exposure to silver nitrate compared to two forms of silver nanoparticles in rainbow trout: bioaccumulation potential with minimal physiological effects
Source: Royal Society of Chemistry journal article supplement (doi:10.1039/c9en00261h), 2019-01-01
Supplement: c9en00261h1.pdf [file c9en00261h1.pdf]

## **Supplementary Information**

**Dietary Exposure to Silver Nitrate Compared to Two Forms of Silver Nanoparticles in Rainbow Trout: Bioaccumulation Potential with Minimal Physiological Effects.**

Nathaniel J. Clark<sup>1</sup>, David Boyle<sup>1</sup>, Benjamin P. Eynon<sup>1</sup> and Richard D. Handy<sup>1</sup>

<sup>1</sup>School of Biological and Marine Sciences, University of Plymouth, Plymouth, United Kingdom.

Corresponding author email: [rhandy@plymouth.ac.uk](mailto:rhandy@plymouth.ac.uk)

Table S1. Plasma Na<sup>+</sup> and K<sup>+</sup> concentrations over the six week experiment.

| Treatment                               | Week 2                    | Week 4                      | Week 6                     |
|-----------------------------------------|---------------------------|-----------------------------|----------------------------|
| Na <sup>+</sup> (mmol L <sup>-1</sup> ) |                           |                             |                            |
| Control                                 | 155.4 ± 2.4 <sup>Aa</sup> | 148.0 ± 14.2 <sup>ABa</sup> | 127.6 ± 12.2 <sup>Aa</sup> |
| AgNO <sub>3</sub>                       | 148.4 ± 6.0 <sup>Aa</sup> | 122.3 ± 16.3 <sup>Aa</sup>  | 132.5 ± 4.1 <sup>Aa</sup>  |
| Ag NPs                                  | 163.6 ± 3.0 <sup>Aa</sup> | 142.1 ± 11.1 <sup>ABa</sup> | 145.1 ± 4.4 <sup>Aa</sup>  |
| Ag <sub>2</sub> S NPs                   | 154.9 ± 2.7 <sup>Aa</sup> | 161.1 ± 5.6 <sup>Ba</sup>   | 140.3 ± 1.3 <sup>Aa</sup>  |
| K <sup>+</sup> (mmol L <sup>-1</sup> )  |                           |                             |                            |
| Control                                 | 1.2 ± 0.2 <sup>Aa</sup>   | 1.3 ± 0.2 <sup>Aa</sup>     | 0.8 ± 0.4 <sup>Aa</sup>    |
| AgNO <sub>3</sub>                       | 3.3 ± 0.4 <sup>Ba</sup>   | 2.4 ± 0.3 <sup>ABab</sup>   | 1.6 ± 0.2 <sup>Ab</sup>    |
| Ag NPs                                  | 2.7 ± 0.4 <sup>BCa</sup>  | 1.8 ± 0.3 <sup>ABb</sup>    | 0.9 ± 0.1 <sup>Ab</sup>    |
| Ag <sub>2</sub> S NPs                   | 1.9 ± 0.4 <sup>ACab</sup> | 2.8 ± 0.5 <sup>Ba</sup>     | 1.6 ± 0.2 <sup>Ab</sup>    |

Data are means ± S.E.M., n = 5/6. Data were analysed by a two-way ANOVA. Upper case denotes significant difference between treatments (columns). Lower case denotes statistical difference over time (rows). Vertical dashed line represents the end of exposure at week 4 where all treatments were placed on the control diet for a further two weeks. Note, the normal ranges reported in the literature for plasma Na<sup>+</sup> and K<sup>+</sup> in rainbow trout are typically 127-164 and 1.9-6.0 mmol L<sup>-1</sup> (\*Hille, 1982), although these are also greatly influenced by dietary salt normally present in the food.

\* Citation: Hille, S., 1982. A literature review of the blood chemistry of rainbow trout, *Salmo gairdneri* Rich. Journal of Fish Biology, 20, 535-569.

Table S2. Tissue concentrations of sodium, potassium, calcium, zinc, manganese and copper at week 4.

| <i>Tissue</i>         | Na <sup>+</sup> (mg/g)   | K <sup>+</sup> (mg/g)      | Ca <sup>2+</sup> (mg/g) | Zn <sup>2+</sup> (mg/g) | Mn <sup>2+</sup> (μg/g) | Cu <sup>2+</sup> (μg/g)    |
|-----------------------|--------------------------|----------------------------|-------------------------|-------------------------|-------------------------|----------------------------|
| <i>Mid</i>            |                          |                            |                         |                         |                         |                            |
| Control               | 4.07 ± 0.26              | 13.73 ± 1.74               | 0.64 ± 0.03             | 2.00 ± 0.74             | 3.3 ± 0.5               | 3.81 ± 0.38                |
| AgNO <sub>3</sub>     | 2.97 ± 0.42              | 9.83 ± 0.57                | 0.50 ± 0.11             | 1.46 ± 0.46             | 2.9 ± 0.7               | 4.72 ± 0.35                |
| Ag NPs                | 3.46 ± 0.31              | 10.29 ± 1.02               | 0.49 ± 0.08             | 1.86 ± 0.55             | 2.7 ± 0.7               | 5.87 ± 0.81                |
| Ag <sub>2</sub> S NPs | 3.52 ± 0.19              | 10.98 ± 1.12               | 0.68 ± 0.08             | 2.07 ± 0.52             | 4.4 ± 1.0               | 5.64 ± 0.43                |
| <i>Hind</i>           |                          |                            |                         |                         |                         |                            |
| Control               | 3.13 ± 0.23 <sup>A</sup> | 13.05 ± 0.56               | 0.39 ± 0.06             | 1.89 ± 0.69             | 6.2 ± 2.2               | 7.37 ± 1.74                |
| AgNO <sub>3</sub>     | 1.83 ± 0.27 <sup>B</sup> | 7.41 ± 0.48                | 0.16 ± 0.07             | 0.56 ± 0.27             | 2.8 ± 1.1               | 9.92 ± 1.12                |
| Ag NPs                | 3.59 ± 0.39 <sup>A</sup> | 10.98 ± 1.14               | 0.42 ± 0.12             | 1.42 ± 0.36             | 1.9 ± 0.6               | 8.38 ± 1.40                |
| Ag <sub>2</sub> S NPs | 2.99 ± 0.20 <sup>A</sup> | 11.48 ± 0.72               | 0.44 ± 0.07             | 1.43 ± 0.30             | 4.0 ± 1.0               | 7.57 ± 0.97                |
| <i>Liver</i>          |                          |                            |                         |                         |                         |                            |
| Control               | 3.18 ± 0.13              | 12.68 ± 0.53               | 0.23 ± 0.03             | 0.09 ± 0.00             | 5.3 ± 0.3               | 127.39 ± 8.24              |
| AgNO <sub>3</sub>     | 2.91 ± 0.12              | 11.59 ± 0.35               | 0.22 ± 0.03             | 0.09 ± 0.00             | 5.2 ± 0.4               | 93.08 ± 9.23               |
| Ag NPs                | 2.84 ± 0.11              | 12.11 ± 0.52               | 0.26 ± 0.06             | 0.10 ± 0.01             | 5.2 ± 0.2               | 93.37 ± 15.52              |
| Ag <sub>2</sub> S NPs | 2.70 ± 0.12              | 10.92 ± 0.43               | 0.20 ± 0.02             | 0.08 ± 0.00             | 4.7 ± 0.2               | 159.00 ± 11.78             |
| <i>Gallbladder</i>    |                          |                            |                         |                         |                         |                            |
| Control               | 22.67 ± 2.77             | 7.99 ± 0.97                | 1.20 ± 0.15             | 0.09 ± 0.02             | 1.6 ± 0.6               | 23.36 ± 7.07 <sup>A</sup>  |
| AgNO <sub>3</sub>     | 20.76 ± 3.70             | 6.27 ± 0.99                | 0.82 ± 0.28             | 0.07 ± 0.02             | 0.7 ± 0.3               | 11.98 ± 1.64 <sup>B</sup>  |
| Ag NPs                | 24.51 ± 6.12             | 8.14 ± 1.16                | 1.18 ± 0.41             | 0.08 ± 0.02             | 2.5 ± 0.9               | 17.70 ± 5.7 <sup>AB</sup>  |
| Ag <sub>2</sub> S NPs | 19.29 ± 2.55             | 4.99 ± 1.20                | 0.95 ± 0.12             | 0.04 ± 0.02             | 1.3 ± 0.3               | 15.82 ± 4.16 <sup>AB</sup> |
| <i>Kidney</i>         |                          |                            |                         |                         |                         |                            |
| Control               | 4.76 ± 0.29              | 9.53 ± 0.55 <sup>A</sup>   | 0.71 ± 0.23             | 0.12 ± 0.01             | 2.7 ± 0.2               | 4.31 ± 0.57 <sup>A</sup>   |
| AgNO <sub>3</sub>     | 5.94 ± 0.55              | 12.51 ± 0.95 <sup>AB</sup> | 1.06 ± 0.32             | 0.15 ± 0.01             | 3.5 ± 0.4               | 7.01 ± 0.45 <sup>B</sup>   |
| Ag NPs                | 6.51 ± 0.22              | 12.71 ± 0.63 <sup>B</sup>  | 2.08 ± 0.34             | 0.14 ± 0.02             | 3.3 ± 0.4               | 5.62 ± 0.72 <sup>AB</sup>  |
| Ag <sub>2</sub> S NPs | 6.79 ± 3.79              | 12.77 ± 0.92 <sup>B</sup>  | 1.51 ± 0.67             | 0.17 ± 0.05             | 3.9 ± 0.3               | 6.61 ± 0.47 <sup>B</sup>   |
| <i>Spleen</i>         |                          |                            |                         |                         |                         |                            |
| Control               | 2.16 ± 0.19              | 16.42 ± 1.38               | 0.14 ± 0.03             | 0.15 ± 0.02             | 2.7 ± 0.2               | 2.10 ± 0.74                |
| AgNO <sub>3</sub>     | 2.19 ± 0.15              | 16.62 ± 0.97               | 0.09 ± 0.02             | 0.17 ± 0.03             | 2.6 ± 0.2               | 3.62 ± 0.29                |
| Ag NPs                | 2.29 ± 0.18              | 16.94 ± 1.52               | 0.07 ± 0.02             | 0.19 ± 0.03             | 2.2 ± 0.2               | 4.39 ± 0.38                |
| Ag <sub>2</sub> S NPs | 2.10 ± 0.18              | 16.79 ± 2.14               | 0.07 ± 0.03             | 0.20 ± 0.03             | 2.2 ± 0.2               | 3.89 ± 0.35                |

|                       |             |              |               |             |             |             |
|-----------------------|-------------|--------------|---------------|-------------|-------------|-------------|
| <i>Gill</i>           |             |              |               |             |             |             |
| Control               | 7.37 ± 0.33 | 17.15 ± 0.56 | 5.19 ± 1.77   | 1.16 ± 0.26 | 6.8 ± 1.0   | 3.51 ± 0.29 |
| AgNO <sub>3</sub>     | 6.71 ± 0.80 | 14.84 ± 1.36 | 5.38 ± 1.82   | 1.30 ± 0.16 | 6.1 ± 0.5   | 3.27 ± 0.12 |
| Ag NPs                | 7.70 ± 0.60 | 14.74 ± 1.09 | 6.13 ± 1.03   | 1.32 ± 0.26 | 7.1 ± 1.1   | 3.51 ± 0.17 |
| Ag <sub>2</sub> S NPs | 6.82 ± 1.40 | 13.79 ± 2.78 | 2.99 ± 0.80   | 1.10 ± 0.19 | 6.7 ± 0.5   | 3.68 ± 0.10 |
| <i>Brain</i>          |             |              |               |             |             |             |
| Control               | 8.55 ± 0.94 | 15.68 ± 1.53 | 16.96 ± 8.04  | 0.10 ± 0.01 | 2.6 ± 0.1   | 5.89 ± 0.43 |
| AgNO <sub>3</sub>     | 9.01 ± 0.74 | 18.99 ± 1.36 | 12.38 ± 10.25 | 0.08 ± 0.01 | 2.7 ± 0.3   | 5.58 ± 0.17 |
| Ag NPs                | 9.45 ± 0.60 | 16.56 ± 1.68 | 24.25 ± 14.56 | 0.09 ± 0.01 | 2.7 ± 0.2   | 5.58 ± 0.42 |
| Ag <sub>2</sub> S NPs | 9.55 ± 1.25 | 16.24 ± 0.88 | 18.85 ± 10.93 | 0.09 ± 0.01 | 2.5 ± 0.3   | 6.64 ± 0.77 |
| <i>Carcass</i>        |             |              |               |             |             |             |
| Control               | 2.22 ± 0.10 | 8.68 ± 0.16  | 11.57 ± 0.99  | 2.77 ± 0.12 | 4.03 ± 0.43 | 1.61 ± 0.05 |
| AgNO <sub>3</sub>     | 2.28 ± 0.11 | 8.34 ± 0.21  | 12.00 ± 1.53  | 3.02 ± 0.20 | 4.57 ± 0.57 | 1.94 ± 0.16 |
| Ag NPs                | 2.24 ± 0.06 | 8.46 ± 0.16  | 12.39 ± 0.47  | 3.06 ± 0.12 | 4.17 ± 0.42 | 1.63 ± 0.13 |
| Ag <sub>2</sub> S NPs | 2.23 ± 0.11 | 8.36 ± 0.46  | 12.22 ± 0.90  | 2.82 ± 0.10 | 3.81 ± 0.22 | 1.67 ± 0.09 |

Data are mean ± S.E.M., n = 5/6. Data were analysed by one-way ANOVA. Different upper case letters within columns denote statistical differences between treatments (columns). Data points with no letters indicate no statistically significant effect in that organ.
